# Supplementary material for: Collision cross section compendium to annotate and predict multi-omic compound identities
Source: Royal Society of Chemistry journal article supplement (doi:10.1039/c8sc04396e), 2018-11-27
Supplement: c8sc04396e1.xlsx [file c8sc04396e1.xlsx]

## Sheet: Single Field Ref Stds
Please input your single field tune mix ion measurments in the table below. This spreadsheet needs to be completed for each data acquisition period (i.e. one spreadsheet for all measuements run in a single day).
Experimental Replicate 1 m/z	Experimental Replicate 2 m/z	Experimental Replicate 3 m/z	Experimental Replicate 1 CCS	Experimental Replicate 2 CCS	Experimental Replicate 3 CCS	Reference Standards m/z	Reference Standards CCS	Experimental Average m/z	m/z error (ppm)	Experimental Average CCS	CCS Std Dev	CCS % RSD	% CCS Difference	Polarity
						118.086	121.3							+
						322.048	153.73							+
						622.029	202.96							+
						922.01	243.64							+
						1221.99	282.2							+
						1521.97	316.96							+
						1821.95	351.25							+
						2121.93	383.03							+
						2421.91	412.96							+
						2721.89	441.21							+
						112.986	108.23							-
						301.998	140.04							-
						601.979	180.77							-
						1033.97	255.34							-
						1333.97	284.76							-
						1633.95	319.03							-
						1933.93	352.55							-
						2233.91	380.74							-
						2533.89	412.99							-
						2833.87	432.62							-
										Averages:

## Sheet: Single Field Data Format
Compound	Formula	CAS	Adduct	Charge	Experimental Replicate 1 m/z	Experimental Replicate 2 m/z	Experimental Replicate 3 m/z	Experimental Replicate 1 CCS	Experimental Replicate 2 CCS	Experimental Replicate 3 CCS	Average Experimental m/z	Average Experimental CCS	Std. Dev	% RSD	CCS/z	Peak Number	Kingdom	Super.Class	Class	Subclass	Source	DOI
Example Lipid	C45H73NO8P	5634-86-6	[M-H]	-1	786.507	786.507	786.511	277.304	277.33	277.27	𝜇 m/z	𝜇 CCS	𝜎	=𝜎/𝜇CCS*100	277.304	1	Organic compounds	Lipids and lipid-like molecules	Glycerophospholipids	Glycerophosphoethanolamines	Research Group	If unpublished, please fill in as "Unpublished".
