# Supplementary material for: Collision cross section compendium to annotate and predict multi-omic compound identities
Source: Royal Society of Chemistry journal article supplement (doi:10.1039/c8sc04396e), 2018-11-27
Supplement: c8sc04396e2.xlsx [file c8sc04396e2.xlsx]

## Sheet: Stepped Field Ref Stds & Scale
Please input your experimental effective length in cell C4 and your tune mix ion measurments in the table below. This spreadsheet needs to be completed for each day of data acquisition.
Experimental Effective Length (cm):
Experimental Replicate 1 m/z	Experimental Replicate 2 m/z	Experimental Replicate 3 m/z	Experimental Replicate 1 CCS	Experimental Replicate 2 CCS	Experimental Replicate 3 CCS	Reference Standard m/z	Reference Standard CCS	Experimental Average m/z	mz error (ppm)	Experimental Average CCS	CCS Std Dev	CCS % RSD	Scale Factor	New Effective Length	Polarity
						118.086	121.3								+
						322.048	153.73								+
						622.029	202.96								+
						922.01	243.64								+
						1221.99	282.2								+
						1521.97	316.96								+
						1821.95	351.25								+
						2121.93	383.03								+
						2421.91	412.96								+
						2721.89	441.21								+
						112.986	108.23								-
						301.998	140.04								-
						601.979	180.77								-
						1033.97	255.34								-
						1333.97	284.76								-
						1633.95	319.03								-
						1933.93	352.55								-
						2233.91	380.74								-
						2533.89	412.99								-
						2833.87	432.62								-
										Averages:			Averages:

## Sheet: Stepped Field Data Format
Compound	Formula	CAS	Adduct	Charge	Experimental Replicate 1 m/z	Experimental Replicate 2 m/z	Experimental Replicate 3 m/z	Experimental Replicate 1 CCS	Experimental Replicate 2 CCS	Experimental Replicate 3 CCS	Average Experimental m/z	Average Experimental CCS	Std. Dev	% RSD	Scaled CCS	CCS/z	Peak Number	Kingdom	Super.Class	Class	Subclass	Source	DOI
Example Lipid	C45H73NO8P	5634-86-6	[M-H]	-1	786.507	786.507	786.511	277.304	277.33	277.27	𝜇 m/z	𝜇 CCS	𝜎	=𝜎/𝜇CCS*100	=𝜇*(old effective length/ new effective length)^2	277.304	1	Organic compounds	Lipids and lipid-like molecules	Glycerophospholipids	Glycerophosphoethanolamines	Research Group	If unpublished, please fill in as "unpublished".
