# Supplementary material for: Collision cross section compendium to annotate and predict multi-omic compound identities
Source: Royal Society of Chemistry journal article supplement (doi:10.1039/c8sc04396e), 2018-11-27
Supplement: c8sc04396e3.pdf [file c8sc04396e3.pdf]

# Collision Cross Section Compendium to Annotate and Predict Multi-omic Compound Identities

Jaqueline A. Picache, Bailey S. Rose, Andrzej Balinski, Katrina L. Leaptrot, Stacy D. Sherrod, Jody C. May, John A. McLean\*

Department of Chemistry, Center for Innovative Technology, Vanderbilt Institute of Chemical Biology, Vanderbilt Institute for Integrative Biosystems Research and Education, Vanderbilt-Ingram Cancer Center; Vanderbilt University, Nashville, Tennessee

\*Corresponding Author Email: [john.a.mclean@vanderbilt.edu](mailto:john.a.mclean@vanderbilt.edu)

## Abstract

Ion mobility mass spectrometry (IM-MS) expands the analyte coverage of existing multi-omic workflows by providing an additional separation dimension as well as a parameter for characterization and identification of molecules – the collision cross section (CCS). This work presents a large, Unified CCS Compendium of > 3800 experimentally acquired CCS values obtained from traceable molecular standards and measured with drift tube-mass spectrometers. An interactive visualization of this Compendium along with data analytic tools have been made openly accessible. Represented in the Compendium are 14 structurally-based chemical super classes, consisting of a total of 80 classes and 157 subclasses. Using this large data set, regression fitting and predictive statistics have been performed to describe mass-CCS correlations specific to each chemical ontology. These structural trends provide a rapid and effective filtering method in the traditional untargeted workflow for identification of unknown biochemical species. The utility of the approach is illustrated by an application to metabolites in human serum, quantified trends of which were used to assess the probability of an unknown compound belonging to a given class. CCS-based filtering narrowed the chemical search space by 60% while increasing the confidence in the remaining isomeric identifications from a single class, thus demonstrating the value of integrating predictive analyses into untargeted experiments to assist in identification workflows. The predictive abilities of this Compendium will improve in specificity and expand to more chemical classes as additional data from the IM-MS community is contributed. Instructions for data submission to the Compendium and criteria for inclusion are provided.

## Table of Contents

|                                                                  |                 |
|------------------------------------------------------------------|-----------------|
| Supplemental Section S1:                                         |                 |
| IM-MS Peak Annotation                                            | Page S3         |
| Supplemental Section S2:                                         |                 |
| Data Inclusion Guidelines – Single Field                         | Page S4 – S6    |
| Data Inclusion Guidelines – Stepped Field                        | Page S7 – S9    |
| Quality Assessment Compounds List                                | Pages S10 – S11 |
| Supplemental Section S3:                                         |                 |
| Scaling Stepped Field Data                                       | Pages S12 – S13 |
| Supplemental Section S4:                                         |                 |
| Chemical Super Classes and Classes Represented in the Compendium | Pages S14 – S15 |
| Supplemental Section S5:                                         |                 |
| Nonlinear Regression Equations                                   | Page S16        |
| Supplemental Section S6:                                         |                 |
| Detailed LC-MS and LC-IM-MS Methods and Instrument Configuration | Page S17        |
| References                                                       | Page S18        |

## Section S1. Ion Mobility Peak Annotation

In data sets in which multiple ion mobility peaks were observed for a single analyte, mobility peaks were annotated by assigning a peak number to each mobility peak. Peak number assignments begin with "1", which refers to the smallest observed CCS or shortest drift time. Each subsequent mobility peak is assigned in numerical order (2, 3, etc.). If only one peak is observed, the CCS value is assigned a "1".

An example is shown in Figure S1. If only one peak is observed, the peak is assigned the number "1".

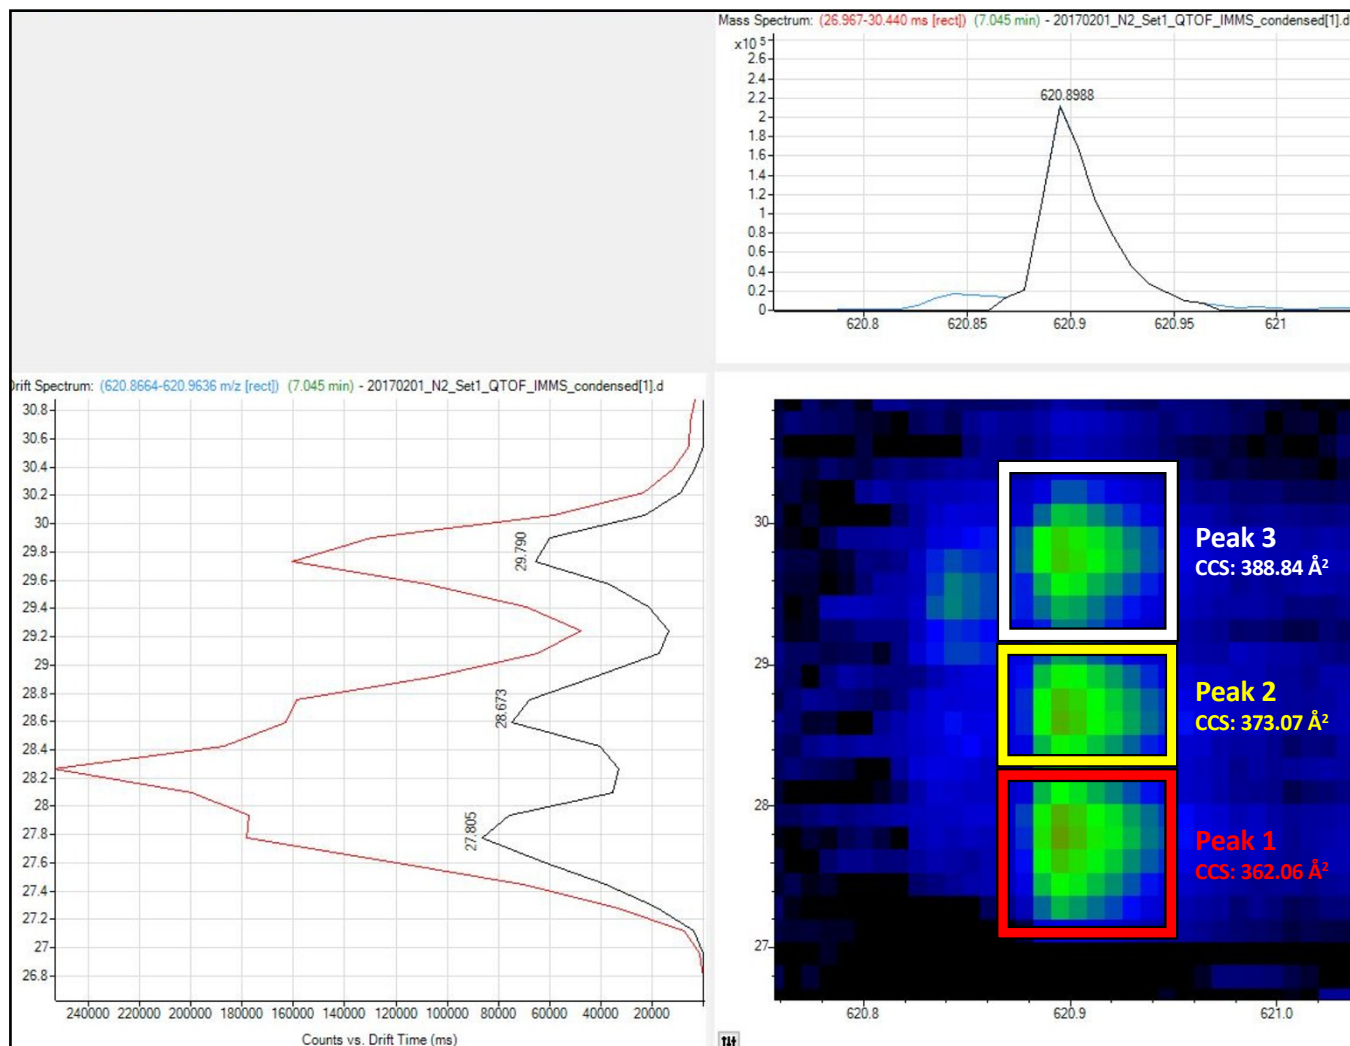

**Figure S1.** Illustration of CCS value annotations for analytes with multiple mobility peaks

## Section S2. Data Inclusion Criteria

The Unified CCS Compendium is anticipated to be a collaborative effort of the IM-MS community; and the authors would like to invite contributions to this open-access repository for quality-controlled CCS measurements. Contributions towards the Unified CCS Compendium will improve informatics tools within the Compendium to aid in IM-MS based multi-omic analyte identification workflows. For consistency, please follow the guidelines below. These guidelines are aimed at standardizing the data submission process and will expedite data quality assessment. Please note that these guidelines are subject to change; and the most up-to-date procedures can be downloaded from the online Compendium.<sup>1</sup> Currently, only the submission of CCS data obtained from drift tube measurements is accepted. In the future, it is anticipated that the Compendium will be expanded to support CCS measurements obtained from other IM techniques.

### Guidelines for data submission into the Unified CCS Compendium

#### Single Field Data

The supplemental information packet includes a file entitled “SI\_SingleField\_DataFormat.xlsx”. The two spreadsheets (“Single Field Reference Standards” and “Single Field Data Format”) within the Excel file will need to be populated prior to submission of single field data to the Unified CCS Compendium. *Caution: If the Excel file is opened in read-only mode, the spreadsheet will not be editable. Please click ‘enable editing’ to proceed.*

Step 1: Collect, at minimum, triplicate measurements of the reference standards for each day samples are acquired.

- Recommended strategy: Infuse reference standards simultaneously with the analyte(s) of interest (i.e., as an internal reference). This allows the reference standards to be measured under the same conditions that the analytes are exposed to.
- If measuring reference standards independently, it is advised to acquire CCS measurements of the reference standards before, during, and after each set of acquisitions to assess any systematic deviations in mass and mobility measurements. This will also allow profiles of pressure, temperature, and electric field to be constructed for each acquisition set, to assist in assessing measurement quality.

Step 2: Collect, at minimum, triplicate measurements of the experimental analytes of interest (if not acquired in step 1). Include  $\geq 5$  compounds from the quality assessment (QA) compounds list (Table S1g) to assess data.

- Experimental values for analytes chosen from the QA compounds list must meet the following criteria:
  - Average CCS percent error of  $\leq 0.5\%$

$$\text{percent error} = \frac{(CCS_{\text{experimental}} - CCS_{QA})}{CCS_{QA}} \cdot 100$$

- Maximum individual CCS percent error  $\leq 1\%$

Step 3: Populate columns A-F in the spreadsheet entitled “Single Field Reference Standards” (see Fig. S2) with experimental data generated from step 1 for each replicate.

- Use rows 5-14 for positive ion data and/or rows 15-24 for negative ion data.
- Single-field CCS and corresponding  $m/z$  values can be obtained using the “CCS Calibration (Single-Field)” method implemented in IM-MS Browser (Agilent Technologies). Alternately, the single-field drift time/CCS relationship can be calculated directly from drift time measurements of reference standards using equations described in previous work.<sup>2</sup>
- Columns G-P in the spreadsheet will be auto-populated. Important: The data in this spreadsheet is intended to be used ONLY for reference standards that were measured, NOT the analytes being submitted to the CCS Compendium.

|    | A                            | B                            | C                            | D                            | E                            | F                            | G                       | H                       | I                        | J               | K                        | L           | M         | N                | O        |
|----|------------------------------|------------------------------|------------------------------|------------------------------|------------------------------|------------------------------|-------------------------|-------------------------|--------------------------|-----------------|--------------------------|-------------|-----------|------------------|----------|
|    | Experimental Replicate 1 m/z | Experimental Replicate 2 m/z | Experimental Replicate 3 m/z | Experimental Replicate 1 CCS | Experimental Replicate 2 CCS | Experimental Replicate 3 CCS | Reference Standards m/z | Reference Standards CCS | Experimental Average m/z | M/z error (ppm) | Experimental Average CCS | CCS Std Dev | CCS % RSD | % CCS Difference | Polarity |
| 4  |                              |                              |                              |                              |                              |                              |                         |                         |                          |                 |                          |             |           |                  |          |
| 5  | 118.086                      | 118.088                      | 118.085                      | 121.40                       | 121.30                       | 121.32                       | 118.086                 | 121.30                  | 118.09                   | 2.82            | 121.34                   | 0.05        | 0.04%     | 0.03%            | +        |
| 6  | 322.048                      | 322.050                      | 322.047                      | 153.80                       | 153.73                       | 153.75                       | 322.048                 | 153.73                  | 322.05                   | 1.04            | 153.76                   | 0.04        | 0.02%     | 0.02%            | +        |
| 7  | 622.029                      | 622.031                      | 622.028                      | 203.00                       | 202.96                       | 202.98                       | 622.029                 | 202.96                  | 622.03                   | 0.54            | 202.98                   | 0.02        | 0.01%     | 0.01%            | +        |
| 8  | 922.010                      | 922.012                      | 922.009                      | 243.70                       | 243.64                       | 243.66                       | 922.010                 | 243.64                  | 922.01                   | 0.36            | 243.67                   | 0.03        | 0.01%     | 0.01%            | +        |
| 9  | 1221.991                     | 1221.993                     | 1221.990                     | 282.30                       | 282.20                       | 282.22                       | 1221.991                | 282.20                  | 1221.99                  | 0.27            | 282.24                   | 0.05        | 0.02%     | 0.01%            | +        |
| 10 | 1521.971                     | 1521.973                     | 1521.970                     | 317.10                       | 316.96                       | 316.98                       | 1521.971                | 316.96                  | 1521.97                  | 0.22            | 317.01                   | 0.08        | 0.02%     | 0.02%            | +        |
| 11 |                              |                              |                              |                              |                              |                              | 1821.952                | 351.25                  |                          |                 |                          |             |           |                  | +        |
| 12 |                              |                              |                              |                              |                              |                              | 2121.933                | 383.03                  |                          |                 |                          |             |           |                  | +        |
| 13 |                              |                              |                              |                              |                              |                              | 2421.914                | 412.96                  |                          |                 |                          |             |           |                  | +        |
| 14 |                              |                              |                              |                              |                              |                              | 2721.895                | 441.21                  |                          |                 |                          |             |           |                  | +        |
| 15 |                              |                              |                              |                              |                              |                              | 112.986                 | 108.23                  |                          |                 |                          |             |           |                  | -        |
| 16 |                              |                              |                              |                              |                              |                              | 301.998                 | 140.04                  |                          |                 |                          |             |           |                  | -        |
| 17 |                              |                              |                              |                              |                              |                              | 601.979                 | 180.77                  |                          |                 |                          |             |           |                  | -        |
| 18 |                              |                              |                              |                              |                              |                              | 1033.969                | 255.34                  |                          |                 |                          |             |           |                  | -        |
| 19 |                              |                              |                              |                              |                              |                              | 1333.969                | 284.76                  |                          |                 |                          |             |           |                  | -        |
| 20 |                              |                              |                              |                              |                              |                              | 1633.950                | 319.03                  |                          |                 |                          |             |           |                  | -        |
| 21 |                              |                              |                              |                              |                              |                              | 1933.931                | 352.55                  |                          |                 |                          |             |           |                  | -        |
| 22 |                              |                              |                              |                              |                              |                              | 2233.911                | 380.74                  |                          |                 |                          |             |           |                  | -        |
| 23 |                              |                              |                              |                              |                              |                              | 2533.892                | 412.99                  |                          |                 |                          |             |           |                  | -        |
| 24 |                              |                              |                              |                              |                              |                              | 2833.873                | 432.62                  |                          |                 |                          |             |           |                  | -        |
| 25 |                              |                              |                              |                              |                              |                              |                         |                         |                          |                 |                          |             |           |                  |          |
|    | Averages:                    |                              |                              |                              |                              |                              |                         |                         |                          |                 |                          | 0.04        | 0.02%     | 0.02%            |          |

Figure S2. "Single Field Reference Standards" spreadsheet

Step 4: Populate Columns A-K and Column Q of the spreadsheet entitled "Single Field Data Format" (see Fig. S3) with experimental data acquired in step 2.

- Columns L-P will be auto-populated.
- Assign peak numbers in Column Q as necessary: smallest CCS = 1, next smallest = 2, etc. If only one peak is observed, assign a "1".

|   | A             | B             | C         | D       | E      | F                            | G                            | H                            | I                            | J                            | K                            | L                        | M                        | N        | O                                    | P      | Q           |
|---|---------------|---------------|-----------|---------|--------|------------------------------|------------------------------|------------------------------|------------------------------|------------------------------|------------------------------|--------------------------|--------------------------|----------|--------------------------------------|--------|-------------|
|   | Compound      | Formula       | CAS       | Adduct  | Charge | Experimental Replicate 1 m/z | Experimental Replicate 2 m/z | Experimental Replicate 3 m/z | Experimental Replicate 1 CCS | Experimental Replicate 2 CCS | Experimental Replicate 3 CCS | Average Experimental m/z | Average Experimental CCS | Std. Dev | %RSD                                 | CCS/z  | Peak Number |
| 1 | Example Lipid | C45H73NO8P    | 5634-86-6 | [M-H]   | -1     | 786.5070                     | 786.5074                     | 786.5109                     | 277.30                       | 277.33                       | 277.27                       | $\mu$ m/z                | $\mu$ CCS                | $\sigma$ | $=\sigma/\mu \text{ CCS} \times 100$ | 277.30 | 1           |
| 3 | Cyclosporin   | C62H111N11O12 |           | [M+H+K] | +2     | 620.9060                     | 620.9068                     | 620.9072                     | 361.68                       | 361.76                       | 362.75                       | 620.91                   | 362.06                   | 0.60     | 0.17                                 | 181.03 | 1           |
| 4 | Cyclosporin   | C62H111N11O12 |           | [M+H+K] | +2     | 620.9060                     | 620.9068                     | 620.9072                     | 373.66                       | 373.09                       | 372.45                       | 620.91                   | 373.07                   | 0.60     | 0.16                                 | 186.53 | 2           |
| 5 | Cyclosporin   | C62H111N11O12 |           | [M+H+K] | +2     | 620.9060                     | 620.9068                     | 620.9072                     | 388.97                       | 389.27                       | 388.27                       | 620.91                   | 388.84                   | 0.51     | 0.13                                 | 194.42 | 3           |
| 6 | Your Data     | Here!         |           |         |        |                              |                              |                              |                              |                              |                              |                          |                          |          |                                      |        |             |

Figure S3. "Single Field Data Format" spreadsheet (Columns A-K)

Step 5: Classify each compound using the ClassyFire web application (found at <http://classyfire.wishartlab.com/>).<sup>3</sup>

- Populate Columns R-W of the spreadsheet entitled "Stepped Field Data Format" (shown in Fig. S4) with the classification information, source (e.g. research group), and DOI (if published).

|   | A             | B             | C         | D       | E      | R                    | S                               | T                    | U                           | V              | W                                                |
|---|---------------|---------------|-----------|---------|--------|----------------------|---------------------------------|----------------------|-----------------------------|----------------|--------------------------------------------------|
|   | Compound      | Formula       | CAS       | Adduct  | Charge | Kingdom              | Super.Class                     | Class                | Subclass                    | Source         | DOI                                              |
| 1 | Example Lipid | C45H73NO8P    | 5634-86-6 | [M-H]   | -1     | Organic compounds    | Lipids and lipid-like molecules | Glycerophospholipids | Glycerophosphoethanolamines | Research Group | If unpublished, please fill in as "Unpublished". |
| 3 | Cyclosporin   | C62H111N11O12 |           | [M+H+K] | +2     | Organic compounds    | Organic polymers                | Polypeptides         |                             | McLean         | Unpublished                                      |
| 4 | Cyclosporin   | C62H111N11O12 |           | [M+H+K] | +2     | Organic compounds    | Organic polymers                | Polypeptides         |                             | McLean         | Unpublished                                      |
| 5 | Cyclosporin   | C62H111N11O12 |           | [M+H+K] | +2     | Organic compounds    | Organic polymers                | Polypeptides         |                             | McLean         | Unpublished                                      |
| 6 | Your Data     | Here!         |           |         |        | Your Classifications | Here!                           |                      |                             |                |                                                  |

Figure S4. "Single Field Data Format" spreadsheet (Columns R-W)

Step 6: Calculate the average RSD for all experimental values (QA compounds as well as all analytes/compounds that are being submitted for inclusion into the Unified CCS Compendium).

- The CCS values submitted must meet the following criteria:
  - Average RSD  $\leq$  0.5% for all experimental data set

- Individual compound RSD  $\leq$  0.7%

Step 7: Double check to ensure that steps 1-6 were performed.

- Step 1: Triplicate measurements acquired for reference standards each day sample measurements were collected.
- Step 2: Triplicate measurements acquired for **all** experimental values, including at least five compounds from the QA compound list.
- Step 3 & 4: Enter all data into the formatted spreadsheets.
- Step 5: Classify all compounds in the provided columns of the spreadsheets.
- Step 6: Calculate average RSD and individual RSDs.

Step 8: Submit spreadsheet for quality assessment.

Data must be submitted by emailing the completed spreadsheet ("SI\_SingleField\_DataFormat.xlsx") to [ccscompendium@vanderbilt.edu](mailto:ccscompendium@vanderbilt.edu).

- Please include the following information with each submission.
  - Institution
  - Research group
  - Instrument source type
  - Solvent/buffer system
  - List of reference compounds included in experimental data set

Upon data submission, the data will temporarily be quarantined and a quality control assessment will be performed. The quality control assessment includes: (1) verifying that all inclusion criteria is met, (2) confirming that all pertinent information is provided, and (3) checking that data is formatted properly. After the authors have processed a dataset (typically less than 10 days), collaborators will be notified which values will be accepted or if any revisions are needed. Data will be made available as soon as the quality control assessment is complete.

Stepped Field Data

The supplemental information packet includes a file entitled “SI\_SteppedField\_ScaleAndDataFormat.xlsx”. The two spreadsheets (“Stepped Field Reference Standards and Scale” and “Stepped Field Data Format”) within the Excel file will need to be populated prior to submission of stepped field data to the Unified CCS Compendium. *Caution: If the Excel file is opened in read-only mode, the spreadsheet will not be editable. Please click ‘enable editing’ to proceed.*

**Step 1:** Collect, at minimum, triplicate measurements of the reference standards for each day samples are acquired.

- Recommended strategy: Infuse reference standards simultaneously with the analyte(s) of interest (i.e., as an internal reference). This allows the reference standards to be measured under the same conditions that the analytes are exposed to.
- If measuring reference standards independently, it is advised to acquire CCS measurements of the reference standards before, during, and after each set of acquisitions to assess any systematic deviations in mass and mobility measurements. This will also allow profiles of pressure, temperature, and electric field to be constructed for each acquisition set, to assist in assessing measurement quality.

**Step 2:** Collect, at minimum, triplicate measurements of the experimental analytes of interest (if not acquired in step 1). Include  $\geq 5$  compounds from the quality assessment (QA) compounds list (Table S1) to assess data quality.

- Experimental values for analytes chosen from the QA compounds list must meet the following criteria:
  - Average CCS percent error of  $\leq 0.5\%$

$$\text{percent error} = \frac{(CCS_{\text{experimental}} - CCS_{QA})}{CCS_{QA}} \cdot 100$$

- Maximum individual CCS percent error  $\leq 1\%$

**Step 3:** Populate columns A-F in the spreadsheet entitled “Stepped Field Reference Standards and Scale” (see Fig. S5) with data generated from step 1 for each replicate.

- True effective lengths for data collected in Step 1 must be calculated using the “Stepped Field Reference Standards and Scale” spreadsheet. Further detail addressing the purpose of scaling as well as the scaling procedure are discussed in supplemental Section S3.
- Use rows 7-16 for positive ion mode and/or rows 17-26 for negative ion mode.
- CCS and  $m/z$  values can be obtained using the “CCS Calculator (Stepped-Field)” method in IM-MS Browser (Agilent Technologies). Alternately, stepped-field CCS values can be calculated from corrected drift times using the fundamental low-field ion mobility equation.<sup>4,5</sup> Drift time correction requires a linear regression analysis incorporating the raw drift time measured at each of the drift fields surveyed, as described previously.<sup>6</sup>
- The experimental effective length (in cm) needs to be entered in the yellow box (Cell D4) located at the top of the spreadsheet. This length can be found in the “BaseDataAccess.dll.config” file located in the Mass Hunter Workstation (Agilent Technologies) install directory (typically: C Drive > Program Files > Agilent > MassHunter > Workstation > IMS > B.07.02 > Bin). Alternately, this is the length value used in the initial CCS calculation that is to be scaled.
- Columns G-P in the spreadsheet will be auto-populated.
- Important: The data in this spreadsheet is ONLY for reference standards that were measured, NOT the analytes being submitted to the CCS Compendium.

|    | A                                   | B                            | C                            | D                            | E                            | F                            | G                      | H                      | I                        | J               | K                        | L           | M         | N            | O                    | P           |
|----|-------------------------------------|------------------------------|------------------------------|------------------------------|------------------------------|------------------------------|------------------------|------------------------|--------------------------|-----------------|--------------------------|-------------|-----------|--------------|----------------------|-------------|
| 4  | Experimental Effective Length (cm): |                              |                              |                              | 78.24                        |                              |                        |                        |                          |                 |                          |             |           |              |                      |             |
| 5  |                                     |                              |                              |                              |                              |                              |                        |                        |                          |                 |                          |             |           |              |                      |             |
| 6  | Experimental Replicate 1 m/z        | Experimental Replicate 2 m/z | Experimental Replicate 3 m/z | Experimental Replicate 1 CCS | Experimental Replicate 2 CCS | Experimental Replicate 3 CCS | Reference Standard m/z | Reference Standard CCS | Experimental Average m/z | M/z error (ppm) | Experimental Average CCS | CCS Std Dev | CCS % RSD | Scale Factor | New Effective Length | Polarity    |
| 7  | 118.086                             | 118.088                      | 118.085                      | 121.40                       | 121.30                       | 121.32                       | 118.086                | 121.30                 | 118.09                   | 2.82            | 121.34                   | 0.05        | 0.04%     | 1.000164867  | 78.25289918          | +           |
| 8  | 322.048                             | 322.050                      | 322.047                      | 152.95                       | 152.95                       | 152.78                       | 322.048                | 153.73                 | 322.05                   | 1.04            | 152.89                   | 0.10        | 0.07%     | 0.997278864  | 78.02709834          | +           |
| 9  | 622.029                             | 622.031                      | 622.028                      | 202.44                       | 202.48                       | 202.29                       | 622.029                | 202.96                 | 622.03                   | 0.54            | 202.40                   | 0.10        | 0.05%     | 0.998627769  | 78.13263665          | +           |
| 10 | 922.010                             | 922.012                      | 922.009                      | 242.09                       | 242.42                       | 242.34                       | 922.010                | 243.64                 | 922.01                   | 0.36            | 242.28                   | 0.17        | 0.07%     | 0.997213979  | 78.02202172          | +           |
| 11 | 1221.991                            | 1221.993                     | 1221.990                     | 280.82                       | 280.84                       | 280.77                       | 1221.991               | 282.20                 | 1221.99                  | 0.27            | 280.81                   | 0.03        | 0.01%     | 0.997533326  | 78.04700741          | +           |
| 12 | 1521.971                            | 1521.973                     | 1521.970                     | 316.34                       | 316.40                       | 316.42                       | 1521.971               | 316.96                 | 1521.97                  | 0.22            | 316.39                   | 0.04        | 0.01%     | 0.999095148  | 78.1692044           | +           |
| 13 |                                     |                              |                              |                              |                              |                              | 1821.952               | 351.25                 |                          |                 |                          |             |           |              |                      | +           |
| 14 |                                     |                              |                              |                              |                              |                              | 2121.933               | 383.03                 |                          |                 |                          |             |           |              |                      | +           |
| 15 |                                     |                              |                              |                              |                              |                              | 2421.914               | 412.96                 |                          |                 |                          |             |           |              |                      | +           |
| 16 |                                     |                              |                              |                              |                              |                              | 2721.895               | 441.21                 |                          |                 |                          |             |           |              |                      | +           |
| 17 |                                     |                              |                              |                              |                              |                              | 112.986                | 108.23                 |                          |                 |                          |             |           |              |                      | -           |
| 18 |                                     |                              |                              |                              |                              |                              | 301.998                | 140.04                 |                          |                 |                          |             |           |              |                      | -           |
| 19 |                                     |                              |                              |                              |                              |                              | 601.979                | 180.77                 |                          |                 |                          |             |           |              |                      | -           |
| 20 |                                     |                              |                              |                              |                              |                              | 1033.969               | 255.34                 |                          |                 |                          |             |           |              |                      | -           |
| 21 |                                     |                              |                              |                              |                              |                              | 1333.969               | 284.76                 |                          |                 |                          |             |           |              |                      | -           |
| 22 |                                     |                              |                              |                              |                              |                              | 1633.950               | 319.03                 |                          |                 |                          |             |           |              |                      | -           |
| 23 |                                     |                              |                              |                              |                              |                              | 1933.931               | 352.55                 |                          |                 |                          |             |           |              |                      | -           |
| 24 |                                     |                              |                              |                              |                              |                              | 2233.911               | 380.74                 |                          |                 |                          |             |           |              |                      | -           |
| 25 |                                     |                              |                              |                              |                              |                              | 2533.892               | 412.99                 |                          |                 |                          |             |           |              |                      | -           |
| 26 |                                     |                              |                              |                              |                              |                              | 2833.873               | 432.62                 |                          |                 |                          |             |           |              |                      | -           |
| 27 | Averages:                           |                              |                              |                              |                              |                              |                        |                        |                          |                 |                          |             | 0.08      | 0.04%        | Averages:            | 78.10847795 |

Figure S5. "Stepped Field Reference Standards and Scale" spreadsheet

**Step 4:** Populate Columns A-K and Column R of the spreadsheet entitled "Stepped Field Data Format" with experimental data acquired in step 2 (see Fig. S6).

- Columns L-Q will be auto-populated.
- Assign peak numbers in Column R as necessary: smallest CCS = 1, next smallest = 2, etc. If only one peak is observed, assign a "1".

|   | A             | B             | C         | D       | E      | F                            | G                            | H                            | I                            | J                            | K                            | L                        | M                        | N        | O                    | P                                                                 | Q      | R           |
|---|---------------|---------------|-----------|---------|--------|------------------------------|------------------------------|------------------------------|------------------------------|------------------------------|------------------------------|--------------------------|--------------------------|----------|----------------------|-------------------------------------------------------------------|--------|-------------|
| 1 | Compound      | Formula       | CAS       | Adduct  | Charge | Experimental Replicate 1 m/z | Experimental Replicate 2 m/z | Experimental Replicate 3 m/z | Experimental Replicate 1 CCS | Experimental Replicate 2 CCS | Experimental Replicate 3 CCS | Average Experimental m/z | Average Experimental CCS | Std. Dev | % RSD                | Scaled CCS                                                        | CCS/z  | Peak Number |
| 2 | Example Lipid | C45H73NO8P    | 5634-86-6 | [M-H]   | -1     | 786.5070                     | 786.5074                     | 786.5109                     | 277.30                       | 277.33                       | 277.27                       | $\mu$ m/z                | $\mu$ CCS                | $\sigma$ | $\sigma/\mu$ CCS*100 | $\mu_z$ *(old effective length/new effective length) <sup>2</sup> | 277.30 | 1           |
| 3 | Cyclosporin   | C62H111N11O12 |           | [M+H+K] | +2     | 620.9060                     | 620.9068                     | 620.9072                     | 361.68                       | 361.76                       | 362.75                       | 620.91                   | 362.06                   | 0.60     | 0.17                 | 363.28                                                            | 181.03 | 1           |
| 4 | Cyclosporin   | C62H111N11O12 |           | [M+H+K] | +2     | 620.9060                     | 620.9068                     | 620.9072                     | 373.66                       | 373.09                       | 372.45                       | 620.91                   | 373.07                   | 0.60     | 0.16                 | 374.32                                                            | 186.53 | 2           |
| 5 | Cyclosporin   | C62H111N11O12 |           | [M+H+K] | +2     | 620.9060                     | 620.9068                     | 620.9072                     | 388.97                       | 389.27                       | 388.27                       | 620.91                   | 388.84                   | 0.51     | 0.13                 | 390.15                                                            | 194.42 | 3           |
| 6 | Your Data     | Here!         |           |         |        |                              |                              |                              | Your                         |                              |                              | Here!                    |                          |          |                      |                                                                   |        |             |

Figure S6. "Stepped Field Data Format" spreadsheet (Columns A-R)

**Step 5:** Classify each compound using the ClassyFire web application (found at <http://classyfire.wishartlab.com/>).<sup>3</sup>

- Populate Columns S-X of the spreadsheet entitled "Stepped Field Data Format" (Fig. S7) with the classification information, source (e.g. research group), and DOI (if published).

|   | A             | B             | C         | D       | E      | S                 | T                               | U                    | V                           | W              | X                                                |
|---|---------------|---------------|-----------|---------|--------|-------------------|---------------------------------|----------------------|-----------------------------|----------------|--------------------------------------------------|
| 1 | Compound      | Formula       | CAS       | Adduct  | Charge | Kingdom           | Super.Class                     | Class                | Subclass                    | Source         | DOI                                              |
| 2 | Example Lipid | C45H73NO8P    | 5634-86-6 | [M-H]   | -1     | Organic compounds | Lipids and lipid-like molecules | Glycerophospholipids | Glycerophosphoethanolamines | Research Group | If unpublished, please fill in as "unpublished". |
| 3 | Cyclosporin   | C62H111N11O12 |           | [M+H+K] | +2     | Organic compounds | Organic polymers                | Polypeptides         |                             | McLean         | Unpublished                                      |
| 4 | Cyclosporin   | C62H111N11O12 |           | [M+H+K] | +2     | Organic compounds | Organic polymers                | Polypeptides         |                             | McLean         | Unpublished                                      |
| 5 | Cyclosporin   | C62H111N11O12 |           | [M+H+K] | +2     | Organic compounds | Organic polymers                | Polypeptides         |                             | McLean         | Unpublished                                      |
| 6 | Your Data     | Here!         |           |         |        | Your              | Classifications                 | Here!                |                             |                |                                                  |

Figure S7. "Stepped Field Data Format" spreadsheet (Columns S-X)

**Step 6:** Calculate the average RSD for *all* experimental values (QA compounds as well as all analytes/compounds that are being submitted for inclusion into the unified CCS compendium).

- The CCS values submitted must meet the following criteria:
  - Average RSD  $\leq$  0.5% for all experimental data set
  - Individual compound RSD  $\leq$  0.7%



Step 7: Check to ensure that steps 1-6 were performed.

- Step 1: At minimum, triplicate measurements were acquired for reference standards for each day that sample measurements were collected.
- Step 2: At minimum, triplicate measurements were acquired for **all** experimental values, including at least five compounds from the QA compound list.
- Step 3 & 4: Enter all data into the formatted spreadsheets.
- Step 5: Classify all compounds in the provided columns of the spreadsheets.
- Step 6: Calculate average RSD and individual RSD.

Step 8: Submit spreadsheet for quality assessment.

Data must be submitted by emailing the completed spreadsheet (“SI\_SteppedField\_ScaleAndDataFormat.xlsx”) to [ccscompendium@vanderbilt.edu](mailto:ccscompendium@vanderbilt.edu).

- Please include the following information with each submission.
  - Institution
  - Research group
  - Instrument source type
  - Solvent/buffer system
  - List of reference compounds included in experimental data set

Upon data submission, the data will temporarily be quarantined and a quality control assessment will be performed. The quality control assessment includes: (1) verifying that all inclusion criteria is met, (2) confirming that all pertinent information is provided, and (3) checking that data is formatted properly. After the authors have processed a dataset (typically less than 10 days), collaborators will be notified which values will be accepted or if any revisions are needed. Data will be made available as soon as the quality control assessment is complete.

**Table S1.** Quality Assessment (QA) Compound ListStandard reference CCS values obtained on a specially-modified drift tube instrument as previously reported.<sup>2</sup>

| Compound                      | <i>m/z</i> | Ion Species | Stepped Field CCS (Å <sup>2</sup> ) | Single Field CCS (Å <sup>2</sup> ) |
|-------------------------------|------------|-------------|-------------------------------------|------------------------------------|
| <b><i>Small Molecules</i></b> |            |             |                                     |                                    |
| Cortisol                      | 363.22     | M+H         | 189.27 ± 0.10                       | 188.34 ± 0.00                      |
| Cortisol                      | 385.20     | M+Na        | 213.72 ± 0.00                       | 212.79 ± 0.07                      |
| Creatinine                    | 112.05     | M-H         | 120.69 ± 0.15                       | 118.84 ± 0.07                      |
| Creatinine                    | 114.07     | M+H         | 123.86 ± 0.00                       | 122.98 ± 0.02                      |
| Creatinine                    | 136.05     | M+Na        | 132.99 ± 0.35                       | 132.61 ± 0.36                      |
| Glucose                       | 203.05     | M+Na        | 147.34 ± 0.29                       | 146.94 ± 0.07                      |
| Homocysteine                  | 136.04     | M+H         | 130.77 ± 0.05                       | 129.58 ± 0.63                      |
| L-arginine                    | 173.10     | M-H         | 138.03 ± 0.05                       | 137.08 ± 0.01                      |
| L-arginine                    | 175.12     | M+H         | 136.84 ± 0.05                       | 136.45 ± 0.00                      |
| L-aspartic acid               | 132.03     | M-H         | 120.39 ± 0.40                       | 119.15 ± 0.04                      |
| L-cystine                     | 239.02     | M-H         | 144.38 ± 0.09                       | 143.58 ± 0.01                      |
| L-cystine                     | 241.03     | M+H         | 150.07 ± 0.05                       | 149.48 ± 0.03                      |
| L-cystine                     | 263.01     | M+Na        | 151.81 ± 0.10                       | 151.26 ± 0.13                      |
| L-glutamic acid               | 146.05     | M-H         | 125.65 ± 0.15                       | 124.47 ± 0.00                      |
| L-histidine                   | 154.06     | M-H         | 130.01 ± 0.09                       | 128.83 ± 0.00                      |
| L-histidine                   | 156.08     | M+H         | 132.74 ± 0.11                       | 131.93 ± 0.02                      |
| L-histidine                   | 178.06     | M+Na        | 135.47 ± 0.50                       | 134.39 ± 0.44                      |
| L-isoleucine                  | 130.09     | M-H         | 131.28 ± 0.05                       | 129.83 ± 0.01                      |
| L-isoleucine                  | 132.10     | M+H         | 133.81 ± 0.04                       | 132.88 ± 0.03                      |
| L-leucine                     | 130.09     | M-H         | 132.51 ± 0.01                       | 131.14 ± 0.00                      |
| L-leucine                     | 132.10     | M+H         | 135.55 ± 0.06                       | 134.57 ± 0.03                      |
| L-lysine                      | 147.11     | M+H         | 131.62 ± 0.52                       | 131.22 ± 0.14                      |
| L-methionine                  | 150.06     | M+H         | 134.07 ± 0.40                       | 133.02 ± 0.47                      |
| L-phenylalanine               | 164.07     | M-H         | 141.29 ± 0.19                       | 139.94 ± 0.03                      |
| L-phenylalanine               | 166.09     | M+H         | 141.27 ± 0.05                       | 140.30 ± 0.12                      |
| L-proline                     | 116.07     | M+H         | 126.21 ± 0.20                       | 125.38 ± 0.08                      |
| L-tyrosine                    | 180.07     | M-H         | 145.58 ± 0.34                       | 144.42 ± 0.07                      |
| L-tyrosine                    | 182.08     | M+H         | 146.44 ± 0.20                       | 145.58 ± 0.12                      |
| Levomefolic Acid              | 458.18     | M-H         | 200.56 ± 0.11                       | 198.99 ± 0.01                      |
| Levomefolic Acid              | 460.19     | M+H         | 197.52 ± 0.26                       | 197.17 ± 0.04                      |
| Pyridoxal Phosphate           | 246.02     | M-H         | 150.80 ± 0.10                       | 149.35 ± 0.04                      |
| Pyridoxal Phosphate           | 248.03     | M+H         | 151.94 ± 0.10                       | 151.37 ± 0.02                      |
| Pyridoxal Phosphate           | 270.01     | M+Na        | 161.40 ± 0.20                       | 161.46 ± 0.20                      |
| Uric Acid                     | 167.02     | M-H         | 126.92 ± 0.05                       | 125.55 ± 0.07                      |
| <b><i>Peptides</i></b>        |            |             |                                     |                                    |
| Angiotensin1                  | 1296.69    | M+H         | 357.31 ± 0.26                       | 355.62 ± 0.41                      |
| Angiotensin1                  | 648.85     | M+2H        | 387.29 ± 0.20                       | 388.41 ± 0.10                      |
| Angiotensin1                  | 432.90     | M+3H        | 474.70 ± 0.15                       | 477.05 ± 0.04                      |
| Angiotensin1                  | 324.93     | M+4H        | 549.23 ± 0.05                       | 550.98 ± 0.07                      |
| Angiotensin2                  | 1046.54    | M+H         | 314.38 ± 0.15                       | 313.65 ± 0.03                      |
| Angiotensin2                  | 523.78     | M+2H        | 353.79 ± 0.17                       | 355.09 ± 0.03                      |
| Angiotensin2                  | 349.52     | M+3H        | 436.23 ± 0.20                       | 437.30 ± 0.12                      |
| Bradykinin                    | 1060.57    | M+H         | 315.25 ± 0.30                       | 314.00 ± 0.12                      |
| Bradykinin                    | 530.79     | M+2H        | 343.32 ± 0.10                       | 344.99 ± 0.03                      |

| Compound        | <i>m/z</i> | Ion Species | Stepped Field CCS (Å <sup>2</sup> ) | Single Field CCS (Å <sup>2</sup> ) |
|-----------------|------------|-------------|-------------------------------------|------------------------------------|
| Bradykinin      | 354.19     | M+3H        | 447.60 ± 0.11                       | 449.07 ± 0.38                      |
| Melittin        | 1423.38    | M+2H        | 613.36 ± 0.11                       | 614.26 ± 0.02                      |
| Melittin        | 949.26     | M+3H        | 721.06 ± 0.53                       | 722.45 ± 0.02                      |
| Melittin        | 712.20     | M+4H        | 756.78 ± 0.53                       | 760.82 ± 0.12                      |
| Melittin        | 569.96     | M+5H        | 808.60 ± 0.60                       | 815.39 ± 0.10                      |
| Melittin        | 569.96     | M+5H        | 844.39 ± 0.25                       | 854.37 ± 0.15                      |
| Neurotensin     | 836.96     | M+2H        | 434.32 ± 0.20                       | 435.42 ± 0.06                      |
| Renin Substrate | 879.97     | M+2H        | 460.38 ± 0.40                       | 461.11 ± 0.03                      |
| Renin Substrate | 586.98     | M+3H        | 518.81 ± 0.36                       | 524.12 ± 0.07                      |
| Renin Substrate | 440.49     | M+4H        | 634.59 ± 0.35                       | 637.65 ± 0.23                      |
| Substance P     | 1347.74    | M+H         | 362.51 ± 0.20                       | 361.44 ± 0.04                      |
| Substance P     | 674.37     | M+2H        | 399.87 ± 0.20                       | 400.09 ± 0.05                      |
| Substance P     | 449.92     | M+3H        | 495.73 ± 1.29                       | 496.51 ± 0.37                      |
| <b>Proteins</b> |            |             |                                     |                                    |
| Cytochrome C    | 773.39     | M+16H       | 3403.2 ± 2.10                       | 3420.2 ± 2.38                      |
| Cytochrome C    | 727.96     | M+17H       | 3538.1 ± 0.28                       | 3554.7 ± 0.70                      |
| Cytochrome C    | 687.57     | M+18H       | 3655.3 ± 1.57                       | 3670.4 ± 0.74                      |
| Cytochrome C    | 651.44     | M+19H       | 3741.8 ± 0.82                       | 3757.9 ± 0.00                      |
| Cytochrome C    | 618.92     | M+20H       | 3816.1 ± 0.79                       | 3832.3 ± 0.00                      |
| Ubiquitin       | 856.98     | M+10H       | 2192.3 ± 0.60                       | 2204.8 ± 0.41                      |
| Ubiquitin       | 779.16     | M+11H       | 2349.1 ± 0.77                       | 2362.3 ± 0.00                      |
| Ubiquitin       | 714.32     | M+12H       | 2424.6 ± 0.88                       | 2444.2 ± 00                        |
| Ubiquitin       | 659.45     | M+13H       | 2577.7 ± 0.63                       | 2594.3 ± 0.53                      |
| Ubiquitin       | 612.41     | M+14H       | 2727.4 ± 4.94                       | 2728.8 ± 1.74                      |
| Ubiquitin       | 1223.80    | M+7         | 1773.2 ± 1.26                       | 1785.4 ± 0.29                      |
| Ubiquitin       | 1223.80    | M+7         | 1875.7 ± 1.03                       | 1884.3 ± 0.29                      |
| Ubiquitin       | 1070.96    | M+8         | 1950.9 ± 0.24                       | 1960.5 ± 0.33                      |
| Ubiquitin       | 952.08     | M+9         | 2052.4 ± 0.64                       | 2063.4 ± 0.00                      |

### Section S3. True Effective Length Calculation and CCS Scaling to Reference Values for Stepped Field DTIMS

The reference CCS values summarized in Table S1g were measured on a drift tube modified with grids at the entrance and exit of the drift region to minimize electric field penetration effects (i.e., fringing fields);<sup>7,8</sup> and allow for CCS calculations to be performed using a precise, geometric length of the drift tube. Thus, these values are considered Standard Reference Values for purposes of accuracy comparisons. Commercially-available drift tubes are prone to drift field inhomogeneity and imprecise determination of the drift length, and therefore, a true effective length must be calculated in order for CCS measurements to correspond to the Standard Reference Values. More detailed information on the sources of measurement variability and a propagation of uncertainty for drift tubes is discussed elsewhere.<sup>2</sup>

The supplemental information packet includes a file entitled “SI\_SteppedField\_ScaleAndDataFormat.xlsx”. The two spreadsheets (“Stepped Field Reference Standards and Scale” and “Stepped Field Data Format”) within the Excel file will need to be populated prior to submission of stepped field data to the unified CCS Compendium. *Caution: If the Excel file is opened in read-only mode, the spreadsheet will not be editable. Please click ‘enable editing’ to proceed.*

**The following true effective length calculation and scaling procedure must be followed for each acquisition period (at least one reference standards calibration and true effective length calculation per day of data acquisition).**

Step 1: Collect at minimum, triplicate measurements of the reference standards for each day samples are acquired.

- Ideal strategy: Infuse reference standards simultaneously with the analyte(s) of interest. This allows the reference standards to be observed in the same conditions that analytes are exposed to.
- If measuring reference standards independently, acquire reference standards CCS measurements before, during, and after each set of acquisition to assess drift in mass and mobility measurements.

Step 2: Populate columns A and B in the spreadsheet entitled “Stepped Field Reference Standards and Scale” (see Fig. S8) with data generated from step 1 for each replicate.

- Use rows 7-16 for positive ion mode and/or rows 17-26 for negative ion mode.
- CCS and  $m/z$  values can be obtained using the “CCS Calculator (Stepped-Field)” method in IM-MS Browser (Agilent Technologies). Alternately, these can be calculated from the fundamental equation as discussed in the previous section.
- The experimental effective length (in cm) needs to be entered in the yellow box (Cell D4) located at the top of the spreadsheet. This length can be found in the “BaseDataAccess.dll.config” file located in the Mass Hunter Workstation (Agilent Technologies) install directory (typically: C Drive > Program Files > Agilent > MassHunter > Workstation > IMS > B.07.02 > Bin). Alternately, this is the length value used in the initial CCS calculation that is to be scaled.

Step 3: Columns C-G will be auto-populated.

- The scale factor in column F is calculated for each reference compound CCS using the following equation:

$$\text{scale factor} = \sqrt{\frac{\text{experimental CCS}}{\text{reference standard CCS}}}$$

- New effective length values for each reference standards ion in Column G are calculated using the equation:  
new effective length = scale factor \* experimental effective length

Step 4: The true effective length (yellow cell G27, at the bottom of the “New Effective Length” column) is automatically calculated.

- This value is the average of all calculated effective lengths originating from each reference standards ion.
- The true effective length value is automatically carried over to the “Stepped Field Data Format spreadsheet” to scale experimental data.

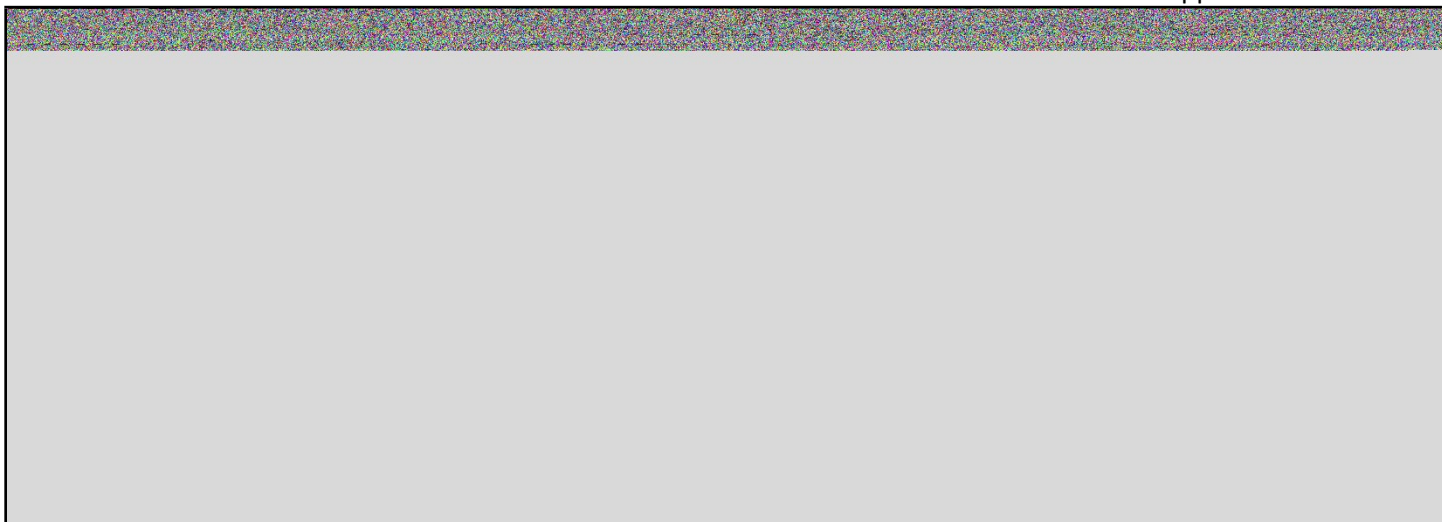

Figure S8. “Stepped Field Reference Standards and Scale” spreadsheet

**Step 5:** To scale experimental CCS values, follow steps 2-6 of the Stepped Field Data Guidelines for Data Submission (Section S1) before continuing.

- Scaled CCS values are auto-populated in column P using the equation:

$$\text{scaled CCS} = \text{experimental CCS} \cdot \left( \frac{\text{experimental effective length}}{\text{true effective length}} \right)^2$$

- An example is shown in Fig. S9

|   | A             | B             | C         | D       | E      | F                            | G                            | H                            | I                            | J                            | K                            | L                        | M                        | N        | O                                 | P                                                                           | Q      | R           |
|---|---------------|---------------|-----------|---------|--------|------------------------------|------------------------------|------------------------------|------------------------------|------------------------------|------------------------------|--------------------------|--------------------------|----------|-----------------------------------|-----------------------------------------------------------------------------|--------|-------------|
|   | Compound      | Formula       | CAS       | Adduct  | Charge | Experimental Replicate 1 m/z | Experimental Replicate 2 m/z | Experimental Replicate 3 m/z | Experimental Replicate 1 CCS | Experimental Replicate 2 CCS | Experimental Replicate 3 CCS | Average Experimental m/z | Average Experimental CCS | Std. Dev | % RSD                             | Scaled CCS                                                                  | CCS/x  | Peak Number |
| 1 | Example Lipid | C45H73NO8P    | 5634-86-6 | [M-H]   | -1     | 786.5070                     | 786.5074                     | 786.5109                     | 277.30                       | 277.33                       | 277.27                       | $\mu$ m/z                | $\mu$ CCS                | $\sigma$ | $\sigma/\mu\text{CCS} \times 100$ | $\mu^2 \cdot (\text{old effective length} / \text{new effective length})^2$ | 277.30 | 1           |
| 2 |               |               |           |         |        |                              |                              |                              |                              |                              |                              |                          |                          |          |                                   |                                                                             |        |             |
| 3 | Cyclosporin   | C62H111N11O12 |           | [M+H+K] | +2     | 620.9060                     | 620.9068                     | 620.9072                     | 361.68                       | 361.76                       | 362.75                       | 620.91                   | 362.06                   | 0.60     | 0.17                              | 363.28                                                                      | 181.03 | 1           |
| 4 | Cyclosporin   | C62H111N11O12 |           | [M+H+K] | +2     | 620.9060                     | 620.9068                     | 620.9072                     | 373.66                       | 373.09                       | 372.45                       | 620.91                   | 373.07                   | 0.60     | 0.16                              | 374.32                                                                      | 186.53 | 2           |
| 5 | Cyclosporin   | C62H111N11O12 |           | [M+H+K] | +2     | 620.9060                     | 620.9068                     | 620.9072                     | 388.97                       | 389.27                       | 388.27                       | 620.91                   | 388.84                   | 0.51     | 0.13                              | 390.15                                                                      | 194.42 | 3           |
| 6 | Your Data     |               | Here!     |         |        |                              |                              |                              |                              |                              |                              |                          |                          |          |                                   |                                                                             |        |             |

Figure S9. “Stepped Field Data Format” spreadsheet (Columns A-Q)

## Section S4

Table S2. All super classes and classes represented in the Unified CCS Compendium at date of submission

| Super Class                             | Class                                         | <i>m/z</i> Range | N   |
|-----------------------------------------|-----------------------------------------------|------------------|-----|
| Alkaloids and derivatives               | Yohimbine alkaloids                           | 609              | 1   |
|                                         |                                               | 138 – 164        | 3   |
| Benzenoids                              | Anthracenes                                   | 178 – 271        | 9   |
|                                         | Benzene and substituted derivatives           | 108 – 886        | 159 |
|                                         | Fluorenes                                     | 166              | 1   |
|                                         | Indanes                                       | 300              | 1   |
|                                         | Naphthalenes                                  | 128 – 254        | 25  |
|                                         | Pentacenes                                    | 278, 280         | 2   |
|                                         | Phenanthrenes and derivatives                 | 178 – 303        | 19  |
|                                         | Phenols                                       | 109 – 208        | 31  |
|                                         | Pyrenes                                       | 202 – 304        | 22  |
| Homogeneous metal compounds             | Homogeneous transition metal compounds        | 132 – 2991       | 62  |
| Homogeneous non-metal compounds         | Non-metal oxoanionic compounds                | 200              | 1   |
| Lipids and lipid-like molecules         | Fatty acyls                                   | 125 – 935        | 223 |
|                                         | Glycerolipids                                 | 253 – 746        | 8   |
|                                         | Glycerophospholipids                          | 171 – 1017       | 334 |
|                                         | Prenol lipids                                 | 137 – 886        | 21  |
|                                         | Sphingolipids                                 | 548 – 8989       | 146 |
|                                         | Steroids and steroid derivatives              | 287 – 648        | 78  |
| Nucleosides, nucleotides, and analogues | (5'→5')-dinucleotides                         | 662 – 783        | 29  |
|                                         | 5'-deoxyribonucleosides                       | 250 – 408        | 19  |
|                                         | Flavin nucleotides                            | 455 – 809        | 9   |
|                                         | Imidazole ribonucleosides and ribonucleotides | 337 – 362        | 4   |
|                                         | Nucleoside and nucleotide analogues           | 24, 268          | 2   |
|                                         | Purine nucleosides                            | 250 – 613        | 49  |
|                                         | Purine nucleotides                            | 280 – 790        | 125 |
|                                         | Pyrimidine nucleosides                        | 226 – 281        | 23  |
|                                         | Pyrimidine nucleotides                        | 304 – 646        | 124 |
| Organic acids and derivatives           | Carboximidic acids and derivatives            | 131, 154         | 2   |
|                                         | Carboxylic acids and derivatives              | 89 – 2110        | 623 |
|                                         | Keto acids and derivatives                    | 115 – 184        | 11  |
|                                         | Hydroxy acids and derivatives                 | 103 – 239        | 12  |
|                                         | Organic carbonic acids and derivatives        | 155              | 1   |
|                                         | Organic phosphonic acids and derivatives      | 124 – 205        | 13  |
|                                         | Organic sulfonic acids and derivatives        | 124 – 213        | 4   |
|                                         | Peptidomimetics                               | 225 – 1317       | 23  |

| Super Class                      | Class                                    | <i>m/z</i> Range | N   |
|----------------------------------|------------------------------------------|------------------|-----|
| Organic acids and derivatives    | Proteins                                 | 493 – 3302       | 139 |
|                                  | Sulfinic acids and derivatives           | 108, 111         | 2   |
|                                  | Tryptic peptides                         | 288 – 1580       | 254 |
| Organic nitrogen compounds       | Organonitrogen compounds                 | 74 – 1233        | 101 |
| Organic oxygen compounds         | Organic oxoanionic compounds             | 227 – 411        | 6   |
|                                  | Organooxygen compounds                   | 105 – 1505       | 340 |
| Organic polymers                 | Cyclic Peptides                          | 1111 – 1704      | 20  |
|                                  | Polypeptides                             | 294 – 1724       | 230 |
| Organohalogen compounds          | Organofluorides                          | 301 – 2834       | 66  |
| Organoheterocyclic compounds     | Azoles                                   | 127 – 458        | 12  |
|                                  | Benzimidazoles                           | 145 – 225        | 4   |
|                                  | Benzodioxoles                            | 191 – 272        | 4   |
|                                  | Benzopyrans                              | 421, 424         | 2   |
|                                  | Dihydrofurans                            | 173 – 350        | 6   |
|                                  | Dithiolanes                              | 228              | 1   |
|                                  | Furofurans                               | 199, 200         | 2   |
|                                  | Imidazopyrimidines                       | 119 – 218        | 60  |
|                                  | Indoles and derivatives                  | 148 – 381        | 69  |
|                                  | Lactams                                  | 348 – 738        | 10  |
|                                  | Lactones                                 | 153 – 350        | 6   |
|                                  | Naphthofurans                            | 821 – 1684       | 14  |
|                                  | Pteridines and derivatives               | 162 – 483        | 28  |
|                                  | Pyridinecarboxylic acids and derivatives | 140              | 1   |
|                                  | Pyridines and derivatives                | 96 – 285         | 52  |
|                                  | Pyrroles                                 | 110              | 1   |
|                                  | Quinolines and derivatives               | 172 – 431        | 17  |
|                                  | Tetrahydroisoquinolines                  | 178 – 181        | 2   |
|                                  | Tetrapyrroles and derivatives            | 563 – 1378       | 9   |
| Triazines                        | 215 – 325                                | 8                |     |
| Phenylpropanoids and polyketides | Anthracyclines                           | 540 – 1320       | 6   |
|                                  | Cinnamaldehydes                          | 133, 134         | 2   |
|                                  | Cinnamic acids and derivatives           | 149 – 360        | 5   |
|                                  | Coumarins and derivatives                | 161, 186         | 2   |
|                                  | Flavonoids                               | 269 – 1424       | 44  |
|                                  | Isoflavonoids                            | 140 – 418        | 16  |
|                                  | Linear 1,3-diarylpropanoids              | 255 – 280        | 4   |
|                                  | Macrolactams                             | 786 - 825        | 3   |
|                                  | Macrolides and analogues                 | 661– 955         | 15  |
|                                  | Phenylpropanoic acids                    | 165 – 284        | 11  |
| Tetracyclines                    | 410                                      | 8                |     |
| Polyhedralcarbon molecules       |                                          | 720, 840         | 2   |

## Section S5. Nonlinear Regression Equations

### Power Fit

$$y = a \cdot x^{-k} + y_0 \quad (1)$$

a is the curve max – curve min; k is the curve rate

### Four-Parameter Sigmoidal Fit (4P)

$$y = y_0 + \frac{y_{max} - y_0}{1 + 10^{(\log y_{50} - x) \cdot H}} \quad (2)$$

$y_{50}$  is x at curve half-maximum; H is the Hill Slope

### Five-Parameter Sigmoidal Fit (5P)

$$y = y_0 + \frac{y_{max} - y_0}{(1 + 10^{((\log y_{50} - x) \cdot H)^S})} \quad (3)$$

S is the curve symmetry parameter

### Confidence Interval

$$z \cdot s_{y,x} \cdot \left( \frac{1}{n} + \frac{(x - \bar{x})^2}{SS_x} \right)^{1/2} \quad (4)$$

z is standard deviations z score based on interval percentage  
(z-score for 99% is 2.576);

$s_{y,x}$  is the standard error of the x and y data inputs;

$SS_x$  is the sum of the squared deviations from the x input mean

### Predictive Intervals

$$z \cdot s_{y,x} \cdot \left( 1 + \frac{1}{n} + \frac{(x - \bar{x})^2}{SS_x} \right)^{1/2} \quad (5)$$



## Section S6. Supplemental Experimental Methods: LC-MS and LC-IM-MS Acquisition Parameters

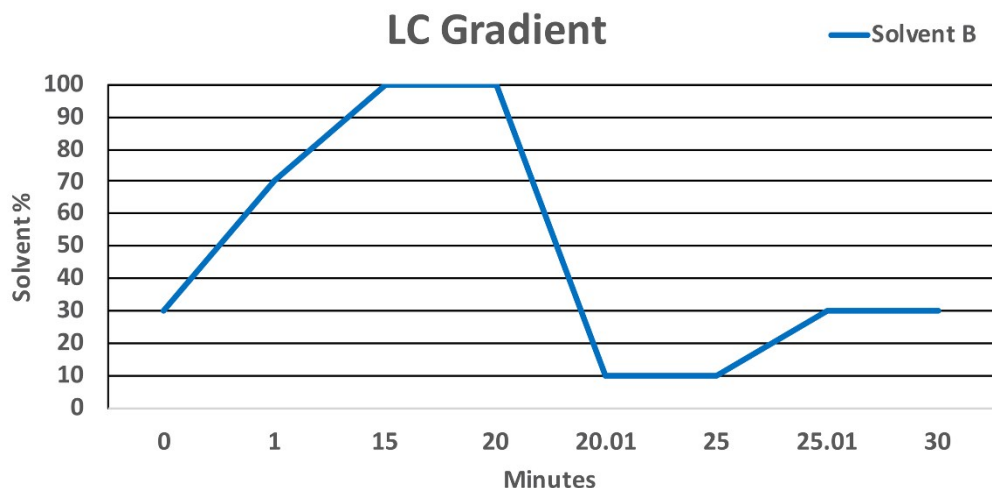

Figure S10. LC Gradient

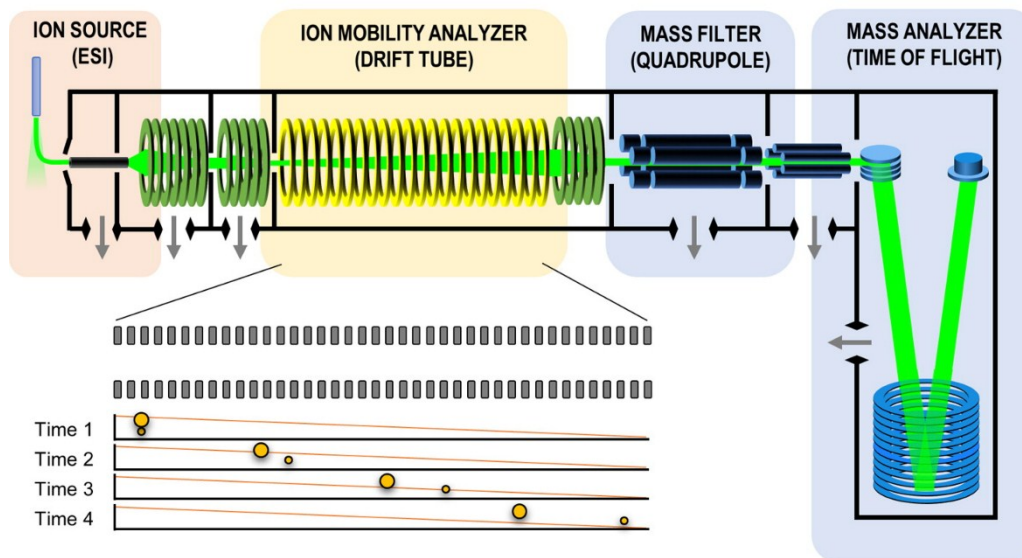

Figure S11. Instrument schematic from reference [6].

Serum samples were analyzed via liquid chromatographic separation using an C18 Zorbax RRHD (1.8 $\mu$ m) column on a 1290 Infinity LC system (Agilent Technologies). Solvent A was water with 0.1% formic acid; and Solvent B was 3:2 isopropanol:acetonitrile with 0.1% formic acid. 2  $\mu$ l of sample were injected via autosampler and separations occurred using a 30 min gradient described in Fig. S5a at 200  $\mu$ l/min. Post-LC separation, analytes were ionized using an electrospray ionization source (Jet Stream, Agilent Technologies) at 300 $^{\circ}$ C and a VCap voltage of 3500 V. The drying gas flow rate was 8 L/min, while the sheath gas flowed at 11 L/min. When data was acquired using LC-IM-MS mode, ion mobility separations were performed using a uniform field drift tube with high-purity nitrogen drift gas at 3.95 Torr at room temperature ( $\sim$ 298 K). A single field analysis at 17.26 V/cm was performed on a standardized calibrant mixture (Agilent Tune Mix) to normalize sample drift times. Time-of-flight scan range was 100  $m/z$  to 1700  $m/z$ . Further information can be found in previous work.<sup>2</sup>

## References

- 1 Mclean Research Group, CCS Compendium, <https://www.vanderbilt.edu/AnS/Chemistry/groups/mcleanlab/ccs.html>.
- 2 S. M. Stow, T. J. Causon, X. Zheng, R. T. Kurulugama, T. Mairinger, J. C. May, E. E. Rennie, E. S. Baker, R. D. Smith, J. A. McLean, S. Hann and J. C. Fjeldsted, *Anal. Chem.*, 2017, **89**, 9048–9055.
- 3 Y. Djoumbou Feunang, R. Eisner, C. Knox, L. Chepelev, J. Hastings, G. Owen, E. Fahy, C. Steinbeck, S. Subramanian, E. Bolton, R. Greiner and D. S. Wishart, *J. Cheminform.*, 2016, **8**, 1–20.
- 4 E. A. Mason and E. W. McDaniel, *Transport Properties of Ions in Gases*, John Wiley & Sons, Ltd., New York City, NY, 1988.
- 5 W. F. Siems, L. A. Viehland and H. H. Hill, *Anal. Chem.*, 2012, **84**, 9782–9791.
- 6 J. C. May, C. R. Goodwin, N. M. Lareau, K. L. Leaptrot, C. B. Morris, R. T. Kurulugama, A. Mordehai, C. Klein, W. Barry, E. Darland, G. Overney, K. Imatani, G. C. Stafford, J. C. Fjeldsted and J. A. McLean, *Anal. Chem.*, 2014, **86**, 2107–2116.
- 7 T. Wyttenbach, P. R. Kemper and M. T. Bowers, *Int J Mass Spectrom*, 2001, **212**, 13–23.
- 8 K. Kaplan, S. Graf, C. Tanner, M. Gonin, K. Fuhrer, R. Knochenmuss, P. Dwivedi and H. H. Hill, *Anal. Chem.*, 2010, **82**, 9336–9343.
